# Supplementary material for: “Radiotherapy for thymic epithelial tumors: What is the optimal dose? A systematic review.”
Source: PubMed Central journal article supplement — Clin Transl Radiat Oncol. 2022 Mar 19;34:67–74. doi: 10.1016/j.ctro.2022.03.005 (PMC8960904; doi:10.1016/j.ctro.2022.03.005), 2022-03-19
Supplement: mmc2.pdf [file mmc2.pdf]

Risk of bias assessment of the studies included in the narrative synthesis, according to the New Castle-Ottawa scoring scale.

| Study        | Selection                                       |                                            |                                  |                                                                                 | Comparability                                                          | Outcome                      |                                                    |                                         | Score |
|--------------|-------------------------------------------------|--------------------------------------------|----------------------------------|---------------------------------------------------------------------------------|------------------------------------------------------------------------|------------------------------|----------------------------------------------------|-----------------------------------------|-------|
|              | Representativeness of the Exposed Cohort<br>0-1 | Selection of the Non-Exposed Cohort<br>0-1 | Ascertainment of Exposure<br>0-1 | Demonstration That Outcome of Interest Was Not Present at Start of Study<br>0-1 | Comparability of Cohorts on the Basis of the Design or Analysis<br>0-2 | Assessment of Outcome<br>0-1 | Follow-Up Long Enough for Outcomes to Occur<br>0-1 | Adequacy of Follow Up of Cohorts<br>0-1 |       |
| C. Fan 2020  | (b) ★                                           | (a) ★                                      | (a) ★                            | (b)                                                                             | ★                                                                      | (b) ★                        | (b)                                                | (b) ★                                   | 6/9   |
| C. Fan 2013  | (b) ★                                           | (a) ★                                      | (a) ★                            | (a) ★                                                                           | ★ ★                                                                    | (b) ★                        | (b)                                                | (c)                                     | 7/9   |
| Chen 2010    | (b) ★                                           | (a) ★                                      | (a) ★                            | (a) ★                                                                           | ★                                                                      | (b) ★                        | (b)                                                | (c)                                     | 6/9   |
| Yang 2019    | (b) ★                                           | (a) ★                                      | (a) ★                            | (a) ★                                                                           | ★                                                                      | (b) ★                        | (a) ★                                              | (c)                                     | 7/9   |
| X-W Fan 2020 | (b) ★                                           | (c)                                        | (a) ★                            | (a) ★                                                                           | NA                                                                     | (a) ★                        | (a) ★                                              | (a) ★                                   | 6/9   |
