# Supplementary material for: “Radiotherapy for thymic epithelial tumors: What is the optimal dose? A systematic review.”
Source: PubMed Central journal article supplement — Clin Transl Radiat Oncol. 2022 Mar 19;34:67–74. doi: 10.1016/j.ctro.2022.03.005 (PMC8960904; doi:10.1016/j.ctro.2022.03.005), 2022-03-19
Supplement: mmc3.pdf [file mmc3.pdf]

**Table 1: Summary of Databases Searched: Edit as needed**

| Table ID           | Provider/Interface           | Database                            | Date searched  | Database update | Searcher(s) | English only? | Date restriction  | Pub types excluded           | Search filter source        | Original # of Items found        | # of deleted duplicates        | # of Unique items found        |
|--------------------|------------------------------|-------------------------------------|----------------|-----------------|-------------|---------------|-------------------|------------------------------|-----------------------------|----------------------------------|--------------------------------|--------------------------------|
| <a href="#">1b</a> | National Library of Medicine | PubMed                              | April 23, 2021 | April 23, 2021  | AA, SP      | Yes           | from 1990         | No limit by publication type | Humans                      | 693                              | 1                              | 692                            |
| <a href="#">1e</a> | OVID                         | Embase®                             | April 23, 2021 | 2021-week 15    | AA, SP      | Yes           | 1990-2021 Week 15 | No limit by publication type | Humans, No Medline journals | 237                              | 2                              | 235                            |
| <a href="#">1f</a> | NLM                          | Clinicaltrials.gov                  | April 23, 2021 | April 23, 2021  | AA, SP      | Yes           | No limit by date  | Clinicaltrials               | No search filter used       | 4                                | 0                              | 4                              |
| <a href="#">1g</a> | COCHRANE                     | Cochrane Library of clinical trials | April 23, 2021 | April 23, 2021  | AA, SP      | Yes           | No limit by date  | Clinicaltrials               | No search filter used       | 32                               | 1                              | 31                             |
|                    |                              |                                     |                |                 |             |               |                   |                              |                             | <b>Original # of Items found</b> | <b># of deleted duplicates</b> | <b># of Unique items found</b> |
|                    |                              |                                     |                |                 |             |               |                   |                              |                             | <b>966</b>                       | <b>4</b>                       | <b>962</b>                     |
|                    |                              |                                     |                |                 |             |               |                   |                              |                             | <b>Totals</b>                    | <b>4</b>                       | <b>962</b>                     |

Niederstadt C, Droste S. Reporting and presenting information retrieval processes: the need for optimizing common practice in health technology assessment. Int J Technol Assess Health Care. 2010;26(4):450-7.



**Table 1a: PubMed search strategy**

|                             |                              |
|-----------------------------|------------------------------|
| <b>Provider/Interface</b>   | National Library of Medicine |
| <b>Database</b>             | PubMed                       |
| <b>Date searched</b>        | 23.4.2021                    |
| <b>Database update</b>      | -                            |
| <b>Search developer(s)</b>  | AA, SP                       |
| <b>Limit to English</b>     | Yes                          |
| <b>Date Range</b>           | 1990 – Today                 |
| <b>Publication Types</b>    | Any                          |
| <b>Search filter source</b> | Humans, English language     |

|   |                                                                                                                                                                                                                                                                                                                                                                                                                                                                                                                                                                                                                                                                                                                                                                                                                                                                                                                                                                                                                                                   |
|---|---------------------------------------------------------------------------------------------------------------------------------------------------------------------------------------------------------------------------------------------------------------------------------------------------------------------------------------------------------------------------------------------------------------------------------------------------------------------------------------------------------------------------------------------------------------------------------------------------------------------------------------------------------------------------------------------------------------------------------------------------------------------------------------------------------------------------------------------------------------------------------------------------------------------------------------------------------------------------------------------------------------------------------------------------|
| 1 | Radiotherapy [Mesh]                                                                                                                                                                                                                                                                                                                                                                                                                                                                                                                                                                                                                                                                                                                                                                                                                                                                                                                                                                                                                               |
| 2 | "Radiotherap* [tw] OR ""Radiation Therap*"" [tw] OR Therapies, Radiation [tw] OR Therapy, Radiation [tw] OR ""Radiation Treatmen*"" [tw] OR Treatment, Radiation [tw] OR Radiotherapy, Targeted [tw] OR Radiotherapies, Targeted [tw] OR ""Targeted Radiotherap*"" [tw] OR ""Targeted Radiation Therap*""[tw] OR Therapy, Targeted Radiation [tw] OR Radiation Therapy, Targeted [tw] OR Protontherapy [tw] or ""Particle therap*""[tw] OR RT [tw]",Most Recent,, ""radiotherap*""[Text Word] OR ""radiation therap*""[Text Word] OR ""therapies radiation""[Text Word] OR ""therapy radiation""[Text Word] OR ""radiation treatmen*""[Text Word] OR ""treatment radiation""[Text Word] OR ""radiotherapy targeted""[Text Word] OR ""radiotherapies targeted""[Text Word] OR ""targeted radiotherap*""[Text Word] OR ""targeted radiation therap*""[Text Word] OR ""therapy targeted radiation""[Text Word] OR ""radiation therapy targeted""[Text Word] OR ""Protontherapy""[Text Word] OR ""particle therap*""[Text Word] OR ""RT""[Text Word]" |
| 3 | #1 OR #                                                                                                                                                                                                                                                                                                                                                                                                                                                                                                                                                                                                                                                                                                                                                                                                                                                                                                                                                                                                                                           |
| 4 | Thymoma [Mesh]                                                                                                                                                                                                                                                                                                                                                                                                                                                                                                                                                                                                                                                                                                                                                                                                                                                                                                                                                                                                                                    |
| 5 | "Thymom* [tw] or ""Thymic Carcinom*"" [tw] or ""Thymic Cancer"" [tw] or ""Thymic tumo*"" [tw] or ""Thymus Carcinom*"" [tw] or ""Thymus tumo*"" [tw] or ""Thymus cancer*"" [tw] or ""Thymic epithelial tumors"" [tw] or TETs [tw]",Most Recent,, ""thymom*""[Text Word] OR ""thymic carcinom*""[Text Word] OR ""Thymic Cancer""[Text Word] OR ""thymic tumo*""[Text Word] OR ""thymus carcinom*""[Text Word] OR ""thymus tumo*""[Text Word] OR ""thymus cancer*""[Text Word] OR ""Thymic epithelial tumors""[Text Word] OR ""TETs""[Text Word]"                                                                                                                                                                                                                                                                                                                                                                                                                                                                                                    |
| 6 | #4 or #5                                                                                                                                                                                                                                                                                                                                                                                                                                                                                                                                                                                                                                                                                                                                                                                                                                                                                                                                                                                                                                          |
| 7 | #3 AND 6#                                                                                                                                                                                                                                                                                                                                                                                                                                                                                                                                                                                                                                                                                                                                                                                                                                                                                                                                                                                                                                         |

**Table 1e: EMBASE® search strategy**

|                             |                                               |
|-----------------------------|-----------------------------------------------|
| <b>Provider/Interface</b>   | OVID                                          |
| <b>Database</b>             | EMBASE                                        |
| <b>Date searched</b>        | 23.4.21                                       |
| <b>Database update</b>      | 2021 – week 15                                |
| <b>Search developer(s)</b>  | AA                                            |
| <b>Limit to English</b>     | Yes                                           |
| <b>Date Range</b>           | 1990- 2021Week 15                             |
| <b>Publication Types</b>    | Any                                           |
| <b>Search filter source</b> | Humans, English language, No MEDLINE Journals |

| #  | Query                                                                                                                                                                                                                                                                                                                                                                      | Results from 23 Apr 2021 |
|----|----------------------------------------------------------------------------------------------------------------------------------------------------------------------------------------------------------------------------------------------------------------------------------------------------------------------------------------------------------------------------|--------------------------|
| 1  | radiotherapy.mp. or external beam radiotherapy/ or respiratory gated radiotherapy/ or cancer radiotherapy/ or hypofractionated radiotherapy/ or preoperative radiotherapy/ or radiotherapy/ or image guided radiotherapy/ or computer assisted radiotherapy/ or adjuvant radiotherapy/ or radiotherapy dosage/ or radiotherapy planning system/ or conformal radiotherapy/ | 592,479                  |
| 2  | radiation therapy.mp.                                                                                                                                                                                                                                                                                                                                                      | 153,742                  |
| 3  | proton therapy.mp.                                                                                                                                                                                                                                                                                                                                                         | 10,443                   |
| 4  | radiotherap\$.mp.                                                                                                                                                                                                                                                                                                                                                          | 594,823                  |
| 5  | exp radiotherapy/                                                                                                                                                                                                                                                                                                                                                          | 552,828                  |
| 6  | exp thymoma/                                                                                                                                                                                                                                                                                                                                                               | 15,358                   |
| 7  | thymom\$.mp.                                                                                                                                                                                                                                                                                                                                                               | 16,107                   |
| 8  | thymic cancer.mp.                                                                                                                                                                                                                                                                                                                                                          | 239                      |
| 9  | thymic tumo\$.mp.                                                                                                                                                                                                                                                                                                                                                          | 1,264                    |
| 10 | thymus cancer.mp.                                                                                                                                                                                                                                                                                                                                                          | 2,013                    |
| 11 | thymus tumo\$.mp.                                                                                                                                                                                                                                                                                                                                                          | 105                      |
| 12 | thymic epithelial tumor\$.mp.                                                                                                                                                                                                                                                                                                                                              | 995                      |
| 13 | thymoma/                                                                                                                                                                                                                                                                                                                                                                   | 13,201                   |

|    |                                                                                              |         |
|----|----------------------------------------------------------------------------------------------|---------|
| 14 | 1 or 2 or 3 or 4 or 5                                                                        | 717,561 |
| 15 | 6 or 7 or 8 or 9 or 10 or 11 or 12 or 13                                                     | 18,334  |
| 16 | 14 and 15                                                                                    | 2,833   |
| 17 | limit 16 to (human and english language and exclude medline journals and yr="1990 -Current") | 237     |

|                                                   |                                                     |
|---------------------------------------------------|-----------------------------------------------------|
| <b>Provider/Interface</b>                         | NLM                                                 |
| <b>Database</b>                                   | Clinicaltrials.gov                                  |
| <b>Date searched</b>                              | 23/04/2021                                          |
| <b>Database update</b>                            | 23/04/2021                                          |
| <b>Search developer(s)</b>                        | AA, SP                                              |
| <b>English only? (default is "Yes")</b>           | Yes                                                 |
| <b>Date range</b>                                 | No limit by date                                    |
| <b>Publication types included</b>                 | Clinicaltrials                                      |
| <b>Search filter source</b>                       | No search filter used                               |
| <b>Items found</b>                                | 4                                                   |
| <b># of deleted duplicates from columns F-G-H</b> | 0                                                   |
| <b>Unique items found</b>                         | 4                                                   |
| <b>Name of saved search: TETs and RT</b>          |                                                     |
| <b>Paste text of search strategy below</b>        |                                                     |
| Condition or Disease                              | Thymoma or Thymic cancer or Thymic epithelial tumor |
| Other                                             | Radiotherapy                                        |

|                                                   |                                     |
|---------------------------------------------------|-------------------------------------|
| <b>Provider/Interface</b>                         | COCHRANE                            |
| <b>Database</b>                                   | Cochrane Library of clinical trials |
| <b>Date searched</b>                              | 23/04/2021                          |
| <b>Database update</b>                            | 23/04/2021                          |
| <b>Search developer(s)</b>                        | AA, SP                              |
| <b>English only? (default is "Yes")</b>           | Yes                                 |
| <b>Date range</b>                                 | No limit by date                    |
| <b>Publication types included</b>                 | Clinicaltrials                      |
| <b>Search filter source</b>                       | No search filter used               |
| <b>Items found</b>                                | 32                                  |
| <b># of deleted duplicates from columns F-G-H</b> | 1                                   |
| <b>Unique items found</b>                         | 31                                  |
| <b>Name of saved search: TETs and RT</b>          |                                     |
| <b>Paste text of search strategy below</b>        |                                     |

ID

Search

#1

(\*Thymoma OR Thymomas OR "Thymic tumor" OR "Thymus neoplasm" OR "Thymus Tumor" OR "Thymic neoplasm" OR "Thymic cancer" OR "Thymus tumor" OR "Thymus tumour" OR Thymus-cancer OR Thymus-tumor OR "Thymic Tumour"):ti,ab,kw AND (\*Radiotherapy OR "Radiation therapy" OR Radiation-therapy OR "Radiation treatment" OR Proton-Therapy OR Protontherapy OR Irradiation OR RT):ti,ab,kw with Publication Year from 1990 to 2021, with Cochrane Library publication date Between Jan 1990 and Apr 2021, in Trials (Word variations have been searched)

**No other Hand-search was performed (Non-database searches, Scopus or Web of Science, Bibliographies, Author names)**
